# Supplementary material
Source: PubMed Central journal article supplement (PMC8638703)
Supplement: NIHMS1758172-supplement-1.pdf [file NIHMS1758172-supplement-1.pdf]

1  
2  
3  
4 549 **Appendix A. Supplementary data**

5  
6  
7 550  
8 551 **Supplementary materials**

9  
10 552 **Table S1.** Characteristics of the study cohort.

| Characters                      | Non-GDM (n=709) | GDM (n=128)    | P value |
|---------------------------------|-----------------|----------------|---------|
| <b>Descriptive measurements</b> |                 |                |         |
| Prepregnant BMI                 |                 |                | 0.223   |
| BMI<18.5                        | 92 (13.0%)      | 18 (14.1%)     |         |
| 18.5≤BMI<25                     | 560 (79.0%)     | 94 (73.4%)     |         |
| BMI≥25                          | 57 (8.0%)       | 16 (12.5%)     |         |
| Multipara                       |                 |                | 0.076   |
| No                              | 504 (71.1%)     | 81 (63.3%)     |         |
| Yes                             | 205 (28.9%)     | 47 (36.7%)     |         |
| Maternal age                    |                 |                | <0.001  |
| <30                             | 439 (61.9%)     | 57 (44.5%)     |         |
| ≥30                             | 270 (38.1%)     | 71 (55.5%)     |         |
| Educational levels              |                 |                | 0.245   |
| High school or lower            | 67 (9.4%)       | 7 (5.5%)       |         |
| College                         | 544 (76.7%)     | 106 (82.8%)    |         |
| Master degree or above          | 98 (13.8%)      | 15 (11.7%)     |         |
| BMI at enrollment               |                 |                |         |
| BMI<18.5                        | 58 (8.2%)       | 9 (7.0%)       |         |
| 18.5≤BMI<25                     | 570 (80.4%)     | 100 (78.1%)    |         |
| BMI≥25                          | 81 (11.4%)      | 19 (14.8%)     |         |
| SBP (mmHg)                      | 108.27 (11.92)  | 109.35 (12.68) | 0.349   |
| DBP (mmHg)                      | 65.62 (8.19)    | 67.59 (8.32)   | 0.371   |
| <b>Biochemistry</b>             |                 |                |         |
| OGTT0 (mmol/L)                  | 4.20 (0.30)     | 4.48 (0.38)    | <0.001  |
| OGTT1 (mmol/L)                  | 7.27 (1.27)     | 9.21 (1.27)    | <0.001  |
| OGTT2 (mmol/L)                  | 6.30 (0.99)     | 8.20 (1.23)    | <0.001  |
| GLU (mmol/L)                    | 4.29 (0.29)     | 4.52 (0.31)    | <0.001  |
| HbA1c (%)                       | 4.92 (0.21)     | 5.05 (0.26)    | <0.001  |
| BUN (mmol/L)                    | 2.75 (0.62)     | 2.74 (0.75)    | 0.828   |
| CREA (μmol/L)                   | 37.36 (5.70)    | 36.70 (5.41)   | 0.224   |
| UA (μmol/L)                     | 240.28 (44.62)  | 244.93 (47.71) | 0.283   |
| TP (g/L)                        | 65.44 (3.15)    | 65.66 (3.48)   | 0.472   |
| ALB (g/L)                       | 38.63 (2.06)    | 38.50 (2.23)   | 0.503   |
| CHOL (mmol/L)                   | 5.81 (0.89)     | 5.76 (1.04)    | 0.604   |
| TG (mmol/L)                     | 2.16 (0.72)     | 2.38 (0.88)    | 0.009   |
| ALT (U/L)                       | 17.97 (11.94)   | 16.15 (11.10)  | 0.111   |
| AST (U/L)                       | 18.31 (6.44)    | 17.27 (6.21)   | 0.090   |
| ALP (U/L)                       | 46.51 (10.09)   | 46.89 (9.77)   | 0.691   |
| LDH (U/L)                       | 165.67 (26.97)  | 169.84 (38.74) | 0.245   |
| GGT (U/L)                       | 15.65 (8.24)    | 15.49 (7.67)   | 0.840   |

61  
62  
63  
64  
65

1  
2  
3  
4  
5  
6  
7  
8  
9  
10  
11  
12  
13  
14  
15  
16  
17  
18  
19  
20  
21  
22  
23  
24  
25  
26  
27  
28  
29  
30  
31  
32  
33  
34  
35  
36  
37  
38  
39  
40  
41  
42  
43  
44  
45  
46  
47  
48  
49  
50  
51  
52  
53  
54  
55  
56  
57  
58  
59  
60  
61  
62  
63  
64  
65

|               |             |             |       |
|---------------|-------------|-------------|-------|
| TBIL (μmol/L) | 7.58 (2.16) | 7.85 (2.55) | 0.274 |
| DBIL (μmol/L) | 2.17 (0.74) | 2.28 (0.77) | 0.143 |
| TBA (μmol/L)  | 1.61 (1.18) | 1.64 (1.20) | 0.817 |
| FMN (mmol/L)  | 1.81 (0.33) | 1.82 (0.30) | 0.724 |

Data presented are mean ± SD or n (%). The t-test and  $\chi^2$  test were between the non-GDM group and GDM group.

BMI: body mass index; SBP: systolic blood pressure; DBP: diastolic blood pressure; OGTT: Oral Glucose Tolerance Test; HbA1: hemoglobin A1; BUN: blood urea nitrogen; CREA: creatinine; UA: uric acid; TP: total protein; ALB: albumin; CHOL: cholesterol; TG: triglyceride; ALT: alanine transaminase; AST: aspartate transaminase; ALP: alkaline phosphatase; LDH: lactic acid dehydrogenase; GGT: gamma-glutamyl transferase; TBIL: total bilirubin; DBIL: direct bilirubin; TBA: total bile acids; FMN: fructosamine.

14  
15  
16  
17  
18  
19  
20  
21  
22  
23  
24  
25  
26  
27  
28  
29  
30  
31  
32  
33  
34  
35  
36  
37  
38  
39  
40  
41  
42  
43  
44  
45  
46  
47  
48  
49  
50  
51  
52  
53  
54  
55  
56  
57  
58  
59  
60  
61  
62  
63  
64  
65

561 **Table S2.** Serum trace element distribution of the study cohort.

| Elements<br>(µg/L) | LOD    | >LOD<br>(%) | Mean    | GM      | Percentile |         |         |         |         | Reference<br>(2.5-97.5%) |
|--------------------|--------|-------------|---------|---------|------------|---------|---------|---------|---------|--------------------------|
|                    |        |             |         |         | 2.5        | 25      | 50      | 75      | 97.5    |                          |
| Ag                 | 0.01   | 100         | 0.22    | 0.15    | 0.04       | 0.09    | 0.13    | 0.19    | 1.19    | —                        |
| As                 | 0.14   | 99          | 0.83    | 0.62    | 0.20       | 0.41    | 0.61    | 0.91    | 2.53    | 0.3-6.4                  |
| Ba                 | 6.48   | 5.7         | 5.13    | 4.83    | 4.58       | 4.58    | 4.58    | 4.58    | 11.61   | —                        |
| Cd                 | 0.09   | 11.1        | 0.07    | 0.07    | 0.06       | 0.06    | 0.06    | 0.06    | 0.17    | 0.07-0.46                |
| Co                 | 0.04   | 100         | 1.71    | 1.68    | 1.22       | 1.49    | 1.66    | 1.87    | 2.45    | 0.05-1.04                |
| Cs                 | 0.04   | 100         | 1.04    | 0.99    | 0.60       | 0.81    | 0.99    | 1.17    | 1.99    | —                        |
| Cu                 | 2.92   | 100         | 1700.82 | 1676.27 | 1151.94    | 1500.05 | 1668.64 | 1875.30 | 2310.30 | 1226-3435                |
| Fe                 | 59.92  | 100         | 1882.28 | 1731.34 | 895.53     | 1321.13 | 1623.33 | 2227.79 | 4098.67 | 592-2613                 |
| Hg                 | 0.05   | 99.8        | 0.86    | 0.44    | 0.13       | 0.27    | 0.37    | 0.58    | 4.82    | —                        |
| La                 | 0.07   | 10.2        | 0.06    | 0.05    | 0.05       | 0.05    | 0.05    | 0.05    | 0.18    | —                        |
| Mn                 | 1.41   | 42.3        | 3.05    | 1.72    | 1.00       | 1.00    | 1.00    | 2.35    | 18.44   | 1.1-8.4                  |
| Mo                 | 0.1    | 100         | 2.89    | 1.57    | 0.82       | 1.17    | 1.50    | 1.94    | 3.66    | 1.2-3.5                  |
| Nd                 | 0.05   | 13.6        | 0.05    | 0.04    | 0.04       | 0.04    | 0.04    | 0.04    | 0.19    | —                        |
| Ni                 | 2.11   | 44.9        | 3.29    | 2.47    | 1.50       | 1.50    | 1.50    | 4.09    | 12.08   | —                        |
| Pr                 | 0.02   | 11.8        | 0.02    | 0.01    | 0.01       | 0.01    | 0.01    | 0.01    | 0.06    | —                        |
| Rb                 | 0.16   | 100         | 530.19  | 513.46  | 325.31     | 431.26  | 509.57  | 605.93  | 863.80  | 145-620                  |
| Sb                 | 0.1    | 100         | 21.72   | 21.53   | 16.96      | 19.87   | 21.38   | 23.25   | 28.05   | —                        |
| Sr                 | 1.8    | 100         | 30.78   | 29.40   | 17.71      | 24.46   | 29.06   | 34.35   | 53.41   | 22.5-92.5                |
| Tl                 | 0.01   | 100         | 0.06    | 0.05    | 0.03       | 0.04    | 0.05    | 0.06    | 0.11    | —                        |
| U                  | 0.0109 | 28.4        | 0.01    | 0.01    | 0.01       | 0.01    | 0.01    | 0.01    | 0.06    | —                        |
| V                  | 0.15   | 79.7        | 1.78    | 1.07    | 0.10       | 0.44    | 1.96    | 2.46    | 3.96    | 0.23-2.56                |
| Zn                 | 87.97  | 100         | 651.39  | 614.19  | 402.43     | 514.33  | 595.18  | 699.74  | 1046.95 | 534-1026                 |

562 GM: geometric mean. Reference values come from the dataset of serum trace element exposure levels of pregnant Chinese women at  
563 second trimester in China Nutrition and Health Survey 2010–2012.

564

14  
15  
16  
17  
18  
19  
20  
21  
22  
23  
24  
25  
26  
27  
28  
29  
30  
31  
32  
33  
34  
35  
36  
37  
38  
39  
40  
41  
42  
43  
44  
45  
46  
47  
48  
49  
50  
51  
52  
53  
54  
55  
56  
57  
58  
59  
60  
61  
62  
63  
64  
65

565 **Table S3.** Association between single serum trace elements concentration and GDM related outcomes.

| Elements<br>( $\mu\text{g/L}$ ) | GDM               |         | IGT                |         | OGTT 0h              |         | OGTT 1h              |         | OGTT 2h             |         |
|---------------------------------|-------------------|---------|--------------------|---------|----------------------|---------|----------------------|---------|---------------------|---------|
|                                 | OR (95% CI)       | P value | OR (95% CI)        | P value | $\beta$ (95% CI)     | P value | $\beta$ (95% CI)     | P value | $\beta$ (95% CI)    | P value |
| Cu                              | 2.05 (0.66, 6.44) | 0.216   | 1.10 (0.37, 3.28)  | 0.865   | 0.13 (-0.003, 0.26)  | 0.055   | 0.20 (-0.37, 0.78)   | 0.483   | 0.40 (-0.09, 0.88)  | 0.110   |
| Zn                              | 0.79 (0.37, 1.58) | 0.533   | 1.29 (0.67, 2.38)  | 0.426   | -0.04 (-0.12, 0.04)  | 0.328   | 0.14 (-0.21, 0.48)   | 0.446   | 0.002 (-0.29, 0.30) | 0.989   |
| As                              | 1.03 (0.77, 1.38) | 0.839   | 1.27 (0.96, 1.67)  | 0.092   | -0.03 (-0.06, 0.01)  | 0.090   | -0.08 (-0.23, 0.07)  | 0.290   | 0.08 (-0.04, 0.21)  | 0.208   |
| Mo                              | 1.00 (0.67, 1.40) | 0.995   | 0.99 (0.67, 1.361) | 0.937   | -0.004 (-0.05, 0.04) | 0.846   | 0.02 (-0.17, 0.20)   | 0.843   | -0.02 (-0.17, 0.14) | 0.842   |
| Hg                              | 0.99 (0.79, 1.22) | 0.911   | 1.15 (0.94, 1.40)  | 0.163   | -0.002 (-0.03, 0.02) | 0.884   | 0.07 (-0.00, 0.18)   | 0.215   | 0.06 (-0.03, 0.15)  | 0.216   |
| Tl                              | 1.13 (0.63, 1.96) | 0.676   | 0.85 (0.47, 1.49)  | 0.577   | -0.01 (-0.08, 0.05)  | 0.691   | -0.004 (-0.33, 0.25) | 0.788   | -0.01 (-0.26, 0.24) | 0.933   |
| Fe                              | 1.12 (0.69, 1.80) | 0.651   | 0.96 (0.60, 1.54)  | 0.880   | -0.002 (-0.06, 0.06) | 0.994   | 0.14 (-0.11, 0.39)   | 0.265   | 0.02 (-0.19, 0.23)  | 0.873   |
| Sr                              | 0.73 (0.36, 1.45) | 0.380   | 1.01 (0.51, 1.94)  | 0.973   | -0.03 (-0.11, 0.05)  | 0.423   | -0.30 (-0.64, 0.05)  | 0.092   | -0.28 (-0.57, 0.01) | 0.059   |
| Ag                              | 0.91 (0.71, 1.17) | 0.484   | 1.07 (0.85, 1.35)  | 0.548   | 0.03 (0.002, 0.06)   | 0.038   | 0.05 (-0.08, 0.18)   | 0.416   | 0.08 (-0.03, 0.19)  | 0.167   |
| Sb                              | 0.84 (0.19, 3.58) | 0.819   | 1.22 (0.29, 4.97)  | 0.787   | 0.04 (-0.13, 0.21)   | 0.620   | -0.05 (-0.81, 0.70)  | 0.889   | 0.12 (-0.52, 0.76)  | 0.719   |
| V                               | 0.92 (0.80, 1.06) | 0.256   | 0.91 (0.79, 1.04)  | 0.151   | -0.001 (-0.02, 0.02) | 0.947   | -0.09 (-0.17, -0.02) | 0.014   | -0.05 (-0.11, 0.01) | 0.125   |
| Co                              | 0.59 (0.20, 1.68) | 0.329   | 0.64 (0.22, 1.78)  | 0.403   | -0.03 (-0.15, 0.09)  | 0.628   | -0.65 (-1.19, -0.12) | 0.017   | -0.28 (-0.73, 0.18) | 0.232   |
| Rb                              | 1.16 (0.54, 2.47) | 0.693   | 1.06 (0.50, 2.20)  | 0.880   | -0.08 (-0.16, 0.01)  | 0.090   | 0.21 (-0.18, 0.60)   | 0.285   | 0.16 (-0.17, 0.50)  | 0.328   |
| Cs                              | 1.07 (0.56, 1.99) | 0.843   | 1.29 (0.69, 2.36)  | 0.417   | -0.09 (-0.17, -0.02) | 0.017   | 0.24 (-0.09, 0.57)   | 0.150   | 0.20 (-0.08, 0.48)  | 0.167   |

OR: odds ratio; CI: confidence interval. Models were adjusted for maternal age, parity, pre-pregnant BMI and educational levels.

14  
15  
16  
17  
18  
19  
20  
21  
22  
23  
24  
25  
26  
27  
28  
29  
30  
31  
32  
33  
34  
35  
36  
37  
38  
39  
40  
41  
42  
43  
44  
45  
46  
47  
48  
49  
50  
51  
52  
53  
54  
55  
56  
57  
58  
59  
60  
61  
62  
63  
64  
65

568 **Table S4.** Association between alpha diversity indexes and GDM related outcomes.

| Diversity indices | GDM                  |         |
|-------------------|----------------------|---------|
|                   | OR (95% CI)          | P value |
| Shannon           | 0.78 (0.62, 0.99)    | 0.037   |
| Simpson           | 0.87 (0.74, 1.03)    | 0.105   |
| Observed OTUs     | 0.74 (0.58, 0.93)    | 0.013   |
|                   | IGT                  |         |
|                   | OR (95% CI)          | P value |
| Shannon           | 0.73 (0.58, 0.92)    | 0.008   |
| Simpson           | 0.81 (0.69, 0.96)    | 0.014   |
| Observed OTUs     | 0.76 (0.60, 0.94)    | 0.015   |
|                   | OGTT 0h              |         |
|                   | $\beta$ (95% CI)     | P value |
| Shannon           | -0.03 (-0.05, 0.001) | 0.059   |
| Simpson           | -0.01 (-0.03, 0.01)  | 0.301   |
| Observed OTUs     | -0.02 (-0.04, 0.004) | 0.112   |
|                   | OGTT 1h              |         |
|                   | $\beta$ (95% CI)     | P value |
| Shannon           | -0.06 (-0.18, 0.06)  | 0.326   |
| Simpson           | -0.06 (-0.15, 0.04)  | 0.245   |
| Observed OTUs     | -0.06 (-0.16, 0.05)  | 0.266   |
|                   | OGTT 2h              |         |
|                   | $\beta$ (95% CI)     | P value |
| Shannon           | -0.13 (-0.24, -0.03) | 0.012   |
| Simpson           | -0.11 (-0.19, -0.02) | 0.011   |
| Observed OTUs     | -0.11 (-0.20, -0.03) | 0.012   |

569 OR: odds ratio; CI: confidence interval. Models were adjusted for maternal age, parity, pre-pregnant BMI and educational levels.

14  
15  
16  
17  
18  
19  
20  
21  
22  
23  
24  
25  
26  
27  
28  
29  
30  
31  
32  
33  
34  
35  
36  
37  
38  
39  
40  
41  
42  
43  
44  
45  
46  
47  
48  
49  
50  
51  
52  
53  
54  
55  
56  
57  
58  
59  
60  
61  
62  
63  
64  
65570 **Table S5.** Composition of co-abundance groups (CAGs).

| CAGs | Taxa                                                                                                                                  |
|------|---------------------------------------------------------------------------------------------------------------------------------------|
| CAG1 | D_0__Bacteria;D_1__Bacteroidetes;D_2__Bacteroidia;D_3__Bacteroidales;D_4__Bacteroidaceae;D_5__Bacteroides                             |
| CAG1 | D_0__Bacteria;D_1__Firmicutes;D_2__Clostridia;D_3__Clostridiales;D_4__Lachnospiraceae;D_5__[Eubacterium] ventriosum group             |
| CAG1 | D_0__Bacteria;D_1__Firmicutes;D_2__Clostridia;D_3__Clostridiales;D_4__Lachnospiraceae;D_5__Lachnospiraceae UCG-010                    |
| CAG1 | D_0__Bacteria;D_1__Firmicutes;D_2__Clostridia;D_3__Clostridiales;D_4__Lachnospiraceae;Other                                           |
| CAG1 | D_0__Bacteria;D_1__Firmicutes;D_2__Clostridia;D_3__Clostridiales;D_4__Ruminococcaceae;D_5__CAG-352                                    |
| CAG1 | D_0__Bacteria;D_1__Firmicutes;D_2__Clostridia;D_3__Clostridiales;D_4__Ruminococcaceae;D_5__Faecalibacterium                           |
| CAG1 | D_0__Bacteria;D_1__Firmicutes;D_2__Negativicutes;D_3__Selenomonadales;D_4__Acidaminococcaceae;D_5__Phascolarctobacterium              |
| CAG1 | D_0__Bacteria;D_1__Proteobacteria;D_2__Deltaproteobacteria;D_3__Desulfovibrionales;D_4__Desulfovibrionaceae;D_5__Bilophila            |
| CAG2 | D_0__Bacteria;D_1__Actinobacteria;D_2__Coriobacteriia;D_3__Coriobacteriales;D_4__Coriobacteriaceae;D_5__Collinsella                   |
| CAG2 | D_0__Bacteria;D_1__Actinobacteria;D_2__Coriobacteriia;D_3__Coriobacteriales;D_4__Eggerthellaceae;D_5__Adlercreutzia                   |
| CAG2 | D_0__Bacteria;D_1__Actinobacteria;D_2__Coriobacteriia;D_3__Coriobacteriales;D_4__Eggerthellaceae;Other                                |
| CAG2 | D_0__Bacteria;D_1__Actinobacteria;D_2__Coriobacteriia;D_3__Coriobacteriales;Other;Other                                               |
| CAG2 | D_0__Bacteria;D_1__Firmicutes;D_2__Clostridia;D_3__Clostridiales;D_4__Clostridiaceae 1;D_5__Clostridium sensu stricto 1               |
| CAG2 | D_0__Bacteria;D_1__Firmicutes;D_2__Clostridia;D_3__Clostridiales;D_4__Clostridiaceae 1;Other                                          |
| CAG2 | D_0__Bacteria;D_1__Firmicutes;D_2__Clostridia;D_3__Clostridiales;D_4__Ruminococcaceae;D_5__Ruminiclostridium 5                        |
| CAG2 | D_0__Bacteria;D_1__Firmicutes;D_2__Clostridia;D_3__Clostridiales;D_4__Ruminococcaceae;D_5__Ruminococcaceae UCG-004                    |
| CAG2 | D_0__Bacteria;D_1__Firmicutes;D_2__Clostridia;D_3__Clostridiales;D_4__Ruminococcaceae;D_5__Ruminococcus 2                             |
| CAG2 | D_0__Bacteria;D_1__Firmicutes;D_2__Clostridia;D_3__Clostridiales;D_4__Ruminococcaceae;D_5__Subdoligranulum                            |
| CAG3 | D_0__Bacteria;D_1__Actinobacteria;D_2__Actinobacteria;D_3__Bifidobacteriales;D_4__Bifidobacteriaceae;D_5__Bifidobacterium             |
| CAG3 | D_0__Bacteria;D_1__Firmicutes;D_2__Bacilli;D_3__Lactobacillales;D_4__Enterococcaceae;D_5__Enterococcus                                |
| CAG3 | D_0__Bacteria;D_1__Firmicutes;D_2__Bacilli;D_3__Lactobacillales;D_4__Lactobacillaceae;D_5__Lactobacillus                              |
| CAG3 | D_0__Bacteria;D_1__Firmicutes;D_2__Bacilli;D_3__Lactobacillales;D_4__Leuconostocaceae;D_5__Weissella                                  |
| CAG3 | D_0__Bacteria;D_1__Firmicutes;D_2__Bacilli;D_3__Lactobacillales;D_4__Streptococcaceae;D_5__Lactococcus                                |
| CAG3 | D_0__Bacteria;D_1__Firmicutes;D_2__Bacilli;D_3__Lactobacillales;D_4__Streptococcaceae;D_5__Streptococcus                              |
| CAG3 | D_0__Bacteria;D_1__Firmicutes;D_2__Clostridia;D_3__Clostridiales;D_4__Lachnospiraceae;D_5__[Eubacterium] hallii group                 |
| CAG3 | D_0__Bacteria;D_1__Firmicutes;D_2__Clostridia;D_3__Clostridiales;D_4__Lachnospiraceae;D_5__Blautia                                    |
| CAG3 | D_0__Bacteria;D_1__Firmicutes;D_2__Clostridia;D_3__Clostridiales;D_4__Peptostreptococcaceae;Other                                     |
| CAG3 | D_0__Bacteria;D_1__Firmicutes;D_2__Clostridia;D_3__Clostridiales;D_4__Ruminococcaceae;D_5__Ruminococcaceae UCG-013                    |
| CAG3 | D_0__Bacteria;D_1__Firmicutes;D_2__Clostridia;D_3__Clostridiales;D_4__Ruminococcaceae;D_5__UBA1819                                    |
| CAG3 | D_0__Bacteria;D_1__Firmicutes;D_2__Erysipelotrichia;D_3__Erysipelotrichales;D_4__Erysipelotrichaceae;D_5__Erysipelotrichaceae UCG-003 |

14  
15  
16  
17  
18  
19  
20  
21  
22  
23  
24  
25  
26  
27  
28  
29  
30  
31  
32  
33  
34  
35  
36  
37  
38  
39  
40  
41  
42  
43  
44  
45  
46  
47  
48  
49  
50  
51  
52  
53  
54  
55  
56  
57  
58  
59  
60  
61  
62  
63  
64  
65

CAG3 D\_0\_\_Bacteria;D\_1\_\_Firmicutes;D\_2\_\_Erysipelotrichia;D\_3\_\_Erysipelotrichales;D\_4\_\_Erysipelotrichaceae;D\_5\_\_Turicibacter  
CAG4 D\_0\_\_Bacteria;D\_1\_\_Actinobacteria;D\_2\_\_Coriobacteriia;D\_3\_\_Coriobacteriales;D\_4\_\_Eggerthellaceae;D\_5\_\_Eggerthella  
CAG4 D\_0\_\_Bacteria;D\_1\_\_Firmicutes;D\_2\_\_Clostridia;D\_3\_\_Clostridiales;D\_4\_\_Lachnospiraceae;D\_5\_\_Lachnoclostridium  
CAG4 D\_0\_\_Bacteria;D\_1\_\_Firmicutes;D\_2\_\_Clostridia;D\_3\_\_Clostridiales;D\_4\_\_Lachnospiraceae;D\_5\_\_Lachnospira  
CAG4 D\_0\_\_Bacteria;D\_1\_\_Firmicutes;D\_2\_\_Clostridia;D\_3\_\_Clostridiales;D\_4\_\_Lachnospiraceae;D\_5\_\_Tyzzerella 3  
CAG4 D\_0\_\_Bacteria;D\_1\_\_Firmicutes;D\_2\_\_Clostridia;D\_3\_\_Clostridiales;D\_4\_\_Ruminococcaceae;D\_5\_\_Butyricicoccus  
CAG4 D\_0\_\_Bacteria;D\_1\_\_Firmicutes;D\_2\_\_Clostridia;D\_3\_\_Clostridiales;D\_4\_\_Ruminococcaceae;D\_5\_\_Flavonifractor  
CAG4 D\_0\_\_Bacteria;D\_1\_\_Firmicutes;D\_2\_\_Negativicutes;D\_3\_\_Selenomonadales;D\_4\_\_Veillonellaceae;D\_5\_\_Megasphaera  
CAG4 D\_0\_\_Bacteria;D\_1\_\_Firmicutes;D\_2\_\_Negativicutes;D\_3\_\_Selenomonadales;D\_4\_\_Veillonellaceae;D\_5\_\_Veillonella  
CAG4 D\_0\_\_Bacteria;D\_1\_\_Fusobacteria;D\_2\_\_Fusobacteriia;D\_3\_\_Fusobacteriales;D\_4\_\_Fusobacteriaceae;D\_5\_\_Fusobacterium  
CAG4 D\_0\_\_Bacteria;D\_1\_\_Proteobacteria;D\_2\_\_Gammaproteobacteria;D\_3\_\_Betaproteobacteriales;D\_4\_\_Burkholderiaceae;D\_5\_\_Parasutterella  
CAG4 D\_0\_\_Bacteria;D\_1\_\_Proteobacteria;D\_2\_\_Gammaproteobacteria;D\_3\_\_Enterobacteriales;D\_4\_\_Enterobacteriaceae;D\_5\_\_Enterobacter  
CAG4 D\_0\_\_Bacteria;D\_1\_\_Proteobacteria;D\_2\_\_Gammaproteobacteria;D\_3\_\_Enterobacteriales;D\_4\_\_Enterobacteriaceae;D\_5\_\_Escherichia-Shigella  
CAG4 D\_0\_\_Bacteria;D\_1\_\_Proteobacteria;D\_2\_\_Gammaproteobacteria;D\_3\_\_Enterobacteriales;D\_4\_\_Enterobacteriaceae;D\_5\_\_Klebsiella  
CAG4 D\_0\_\_Bacteria;D\_1\_\_Proteobacteria;D\_2\_\_Gammaproteobacteria;D\_3\_\_Enterobacteriales;D\_4\_\_Enterobacteriaceae;Other  
CAG4 D\_0\_\_Bacteria;D\_1\_\_Proteobacteria;D\_2\_\_Gammaproteobacteria;D\_3\_\_Pasteurellales;D\_4\_\_Pasteurellaceae;D\_5\_\_Haemophilus  
CAG4 D\_0\_\_Bacteria;D\_1\_\_Proteobacteria;D\_2\_\_Gammaproteobacteria;Other;Other;Other  
CAG5 D\_0\_\_Bacteria;D\_1\_\_Actinobacteria;D\_2\_\_Coriobacteriia;D\_3\_\_Coriobacteriales;D\_4\_\_Eggerthellaceae;D\_5\_\_Senegalimassilia  
CAG5 D\_0\_\_Bacteria;D\_1\_\_Bacteroidetes;D\_2\_\_Bacteroidia;D\_3\_\_Bacteroidales;D\_4\_\_Muribaculaceae;D\_5\_\_metagenome  
CAG5 D\_0\_\_Bacteria;D\_1\_\_Bacteroidetes;D\_2\_\_Bacteroidia;D\_3\_\_Bacteroidales;D\_4\_\_Prevotellaceae;D\_5\_\_Alloprevotella  
CAG5 D\_0\_\_Bacteria;D\_1\_\_Bacteroidetes;D\_2\_\_Bacteroidia;D\_3\_\_Bacteroidales;D\_4\_\_Prevotellaceae;D\_5\_\_Prevotella 2  
CAG5 D\_0\_\_Bacteria;D\_1\_\_Bacteroidetes;D\_2\_\_Bacteroidia;D\_3\_\_Bacteroidales;D\_4\_\_Prevotellaceae;D\_5\_\_Prevotella 7  
CAG5 D\_0\_\_Bacteria;D\_1\_\_Bacteroidetes;D\_2\_\_Bacteroidia;D\_3\_\_Bacteroidales;D\_4\_\_Prevotellaceae;D\_5\_\_Prevotella 9  
CAG5 D\_0\_\_Bacteria;D\_1\_\_Bacteroidetes;D\_2\_\_Bacteroidia;D\_3\_\_Bacteroidales;D\_4\_\_Prevotellaceae;D\_5\_\_Prevotellaceae NK3B31 group  
CAG5 D\_0\_\_Bacteria;D\_1\_\_Bacteroidetes;D\_2\_\_Bacteroidia;D\_3\_\_Bacteroidales;D\_4\_\_Prevotellaceae;Other  
CAG5 D\_0\_\_Bacteria;D\_1\_\_Firmicutes;D\_2\_\_Clostridia;D\_3\_\_Clostridiales;D\_4\_\_Lachnospiraceae;D\_5\_\_[Eubacterium] ruminantium group  
CAG5 D\_0\_\_Bacteria;D\_1\_\_Firmicutes;D\_2\_\_Clostridia;D\_3\_\_Clostridiales;D\_4\_\_Lachnospiraceae;D\_5\_\_Coprococcus 2  
CAG5 D\_0\_\_Bacteria;D\_1\_\_Firmicutes;D\_2\_\_Clostridia;D\_3\_\_Clostridiales;D\_4\_\_Lachnospiraceae;D\_5\_\_Pseudobutyrvibrio  
CAG5 D\_0\_\_Bacteria;D\_1\_\_Firmicutes;D\_2\_\_Erysipelotrichia;D\_3\_\_Erysipelotrichales;D\_4\_\_Erysipelotrichaceae;D\_5\_\_Catenibacterium  
CAG5 D\_0\_\_Bacteria;D\_1\_\_Firmicutes;D\_2\_\_Erysipelotrichia;D\_3\_\_Erysipelotrichales;D\_4\_\_Erysipelotrichaceae;D\_5\_\_Holdemanella  
CAG5 D\_0\_\_Bacteria;D\_1\_\_Firmicutes;D\_2\_\_Negativicutes;D\_3\_\_Selenomonadales;D\_4\_\_Veillonellaceae;D\_5\_\_Allisonella  
CAG5 D\_0\_\_Bacteria;D\_1\_\_Firmicutes;D\_2\_\_Negativicutes;D\_3\_\_Selenomonadales;D\_4\_\_Veillonellaceae;D\_5\_\_Dialister  
CAG5 D\_0\_\_Bacteria;D\_1\_\_Firmicutes;D\_2\_\_Negativicutes;D\_3\_\_Selenomonadales;D\_4\_\_Veillonellaceae;D\_5\_\_Megamonas

14  
15  
16  
17  
18  
19  
20 CAG5 D\_0\_\_Bacteria;D\_1\_\_Firmicutes;D\_2\_\_Negativicutes;D\_3\_\_Selenomonadales;D\_4\_\_Veillonellaceae;D\_5\_\_Mitsuokella  
21 CAG6 D\_0\_\_Bacteria;D\_1\_\_Actinobacteria;D\_2\_\_Coriobacteriia;D\_3\_\_Coriobacteriales;D\_4\_\_Coriobacteriales Incertae Sedis;D\_5\_\_uncultured  
22 CAG6 D\_0\_\_Bacteria;D\_1\_\_Bacteroidetes;D\_2\_\_Bacteroidia;D\_3\_\_Bacteroidales;D\_4\_\_Barnesiellaceae;D\_5\_\_Barnesiella  
23 CAG6 D\_0\_\_Bacteria;D\_1\_\_Bacteroidetes;D\_2\_\_Bacteroidia;D\_3\_\_Bacteroidales;D\_4\_\_Marinifilaceae;D\_5\_\_Butyricimonas  
24 CAG6 D\_0\_\_Bacteria;D\_1\_\_Bacteroidetes;D\_2\_\_Bacteroidia;D\_3\_\_Bacteroidales;D\_4\_\_Marinifilaceae;D\_5\_\_Odoribacter  
25 CAG6 D\_0\_\_Bacteria;D\_1\_\_Bacteroidetes;D\_2\_\_Bacteroidia;D\_3\_\_Bacteroidales;D\_4\_\_Muribaculaceae;D\_5\_\_uncultured bacterium  
26 CAG6 D\_0\_\_Bacteria;D\_1\_\_Bacteroidetes;D\_2\_\_Bacteroidia;D\_3\_\_Bacteroidales;D\_4\_\_Muribaculaceae;Other  
27 CAG6 D\_0\_\_Bacteria;D\_1\_\_Bacteroidetes;D\_2\_\_Bacteroidia;D\_3\_\_Bacteroidales;D\_4\_\_Prevotellaceae;D\_5\_\_Paraprevotella  
28 CAG6 D\_0\_\_Bacteria;D\_1\_\_Bacteroidetes;D\_2\_\_Bacteroidia;D\_3\_\_Bacteroidales;D\_4\_\_Rikenellaceae;D\_5\_\_Alistipes  
29 CAG6 D\_0\_\_Bacteria;D\_1\_\_Bacteroidetes;D\_2\_\_Bacteroidia;D\_3\_\_Bacteroidales;D\_4\_\_Tannerellaceae;D\_5\_\_Parabacteroides  
30 CAG6 D\_0\_\_Bacteria;D\_1\_\_Bacteroidetes;D\_2\_\_Bacteroidia;D\_3\_\_Bacteroidales;Other;Other  
31 CAG6 D\_0\_\_Bacteria;D\_1\_\_Firmicutes;D\_2\_\_Clostridia;D\_3\_\_Clostridiales;D\_4\_\_Christensenellaceae;D\_5\_\_Christensenellaceae R-7 group  
32 CAG6 D\_0\_\_Bacteria;D\_1\_\_Firmicutes;D\_2\_\_Clostridia;D\_3\_\_Clostridiales;D\_4\_\_Ruminococcaceae;D\_5\_\_[Eubacterium] coprostanoligenes group  
33 CAG6 D\_0\_\_Bacteria;D\_1\_\_Firmicutes;D\_2\_\_Clostridia;D\_3\_\_Clostridiales;D\_4\_\_Ruminococcaceae;D\_5\_\_Negativibacillus  
34 CAG6 D\_0\_\_Bacteria;D\_1\_\_Firmicutes;D\_2\_\_Clostridia;D\_3\_\_Clostridiales;D\_4\_\_Ruminococcaceae;D\_5\_\_Ruminiclostridium 6  
35 CAG6 D\_0\_\_Bacteria;D\_1\_\_Firmicutes;D\_2\_\_Clostridia;D\_3\_\_Clostridiales;D\_4\_\_Ruminococcaceae;D\_5\_\_Ruminococcaceae NK4A214 group  
36 CAG6 D\_0\_\_Bacteria;D\_1\_\_Firmicutes;D\_2\_\_Clostridia;D\_3\_\_Clostridiales;D\_4\_\_Ruminococcaceae;D\_5\_\_Ruminococcaceae UCG-002  
37 CAG6 D\_0\_\_Bacteria;D\_1\_\_Firmicutes;D\_2\_\_Clostridia;D\_3\_\_Clostridiales;D\_4\_\_Ruminococcaceae;D\_5\_\_Ruminococcaceae UCG-005  
38 CAG6 D\_0\_\_Bacteria;D\_1\_\_Firmicutes;D\_2\_\_Clostridia;D\_3\_\_Clostridiales;D\_4\_\_Ruminococcaceae;D\_5\_\_Ruminococcaceae UCG-010  
39 CAG6 D\_0\_\_Bacteria;D\_1\_\_Firmicutes;D\_2\_\_Clostridia;D\_3\_\_Clostridiales;D\_4\_\_Ruminococcaceae;D\_5\_\_Ruminococcaceae UCG-014  
40 CAG6 D\_0\_\_Bacteria;D\_1\_\_Firmicutes;D\_2\_\_Clostridia;D\_3\_\_Clostridiales;D\_4\_\_Ruminococcaceae;D\_5\_\_Ruminococcus 1  
41 CAG6 D\_0\_\_Bacteria;D\_1\_\_Firmicutes;D\_2\_\_Clostridia;D\_3\_\_Clostridiales;D\_4\_\_Ruminococcaceae;D\_5\_\_uncultured  
42 CAG6 D\_0\_\_Bacteria;D\_1\_\_Firmicutes;D\_2\_\_Clostridia;D\_3\_\_Clostridiales;D\_4\_\_Ruminococcaceae;Other  
43 CAG6 D\_0\_\_Bacteria;D\_1\_\_Firmicutes;D\_2\_\_Clostridia;D\_3\_\_Clostridiales;Other;Other  
44 CAG6 D\_0\_\_Bacteria;D\_1\_\_Proteobacteria;D\_2\_\_Deltaproteobacteria;D\_3\_\_Desulfovibrionales;D\_4\_\_Desulfovibrionaceae;D\_5\_\_Desulfovibrio  
45 CAG6 D\_0\_\_Bacteria;D\_1\_\_Tenericutes;D\_2\_\_Mollicutes;D\_3\_\_Mollicutes RF39;Other;Other  
46 CAG6 D\_0\_\_Bacteria;D\_1\_\_Verrucomicrobia;D\_2\_\_Verrucomicrobiae;D\_3\_\_Verrucomicrobiales;D\_4\_\_Akkermansiaceae;D\_5\_\_Akkermansia  
47 CAG6 D\_0\_\_Bacteria;Other;Other;Other;Other;Other  
48 CAG7 D\_0\_\_Bacteria;D\_1\_\_Firmicutes;D\_2\_\_Clostridia;D\_3\_\_Clostridiales;D\_4\_\_Lachnospiraceae;D\_5\_\_[Ruminococcus] torques group  
49 CAG7 D\_0\_\_Bacteria;D\_1\_\_Firmicutes;D\_2\_\_Clostridia;D\_3\_\_Clostridiales;D\_4\_\_Lachnospiraceae;D\_5\_\_Agathobacter  
50 CAG7 D\_0\_\_Bacteria;D\_1\_\_Firmicutes;D\_2\_\_Clostridia;D\_3\_\_Clostridiales;D\_4\_\_Lachnospiraceae;D\_5\_\_Anaerostipes  
51 CAG7 D\_0\_\_Bacteria;D\_1\_\_Firmicutes;D\_2\_\_Clostridia;D\_3\_\_Clostridiales;D\_4\_\_Lachnospiraceae;D\_5\_\_Dorea  
52 CAG7 D\_0\_\_Bacteria;D\_1\_\_Firmicutes;D\_2\_\_Clostridia;D\_3\_\_Clostridiales;D\_4\_\_Lachnospiraceae;D\_5\_\_Fusicatenibacter  
53  
54  
55  
56  
57  
58  
59  
60  
61  
62  
63  
64  
65



14  
15  
16  
17  
18  
19  
20  
21  
22  
23  
24  
25  
26  
27  
28  
29  
30  
31  
32  
33  
34  
35  
36  
37  
38  
39  
40  
41  
42  
43  
44  
45  
46  
47  
48  
49  
50  
51  
52  
53  
54  
55  
56  
57  
58  
59  
60  
61  
62  
63  
64  
65

CAG7 D\_0\_\_Bacteria;D\_1\_\_Firmicutes;D\_2\_\_Clostridia;D\_3\_\_Clostridiales;D\_4\_\_Lachnospiraceae;D\_5\_\_Lachnospiraceae NK4A136 group  
CAG7 D\_0\_\_Bacteria;D\_1\_\_Firmicutes;D\_2\_\_Clostridia;D\_3\_\_Clostridiales;D\_4\_\_Lachnospiraceae;D\_5\_\_Roseburia  
CAG7 D\_0\_\_Bacteria;D\_1\_\_Firmicutes;D\_2\_\_Clostridia;D\_3\_\_Clostridiales;D\_4\_\_Peptostreptococcaceae;D\_5\_\_Romboutsia  
CAG7 D\_0\_\_Bacteria;D\_1\_\_Firmicutes;Other;Other;Other;Other

---

571

1  
2  
3  
4  
5  
6  
7  
8  
9  
10  
11  
12  
13  
14  
15  
16  
17  
18  
19  
20  
21  
22  
23  
24  
25  
26  
27  
28  
29  
30  
31  
32  
33  
34  
35  
36  
37  
38  
39  
40  
41  
42  
43  
44  
45  
46  
47  
48  
49  
50  
51  
52  
53  
54  
55  
56  
57  
58  
59  
60  
61  
62  
63  
64  
65

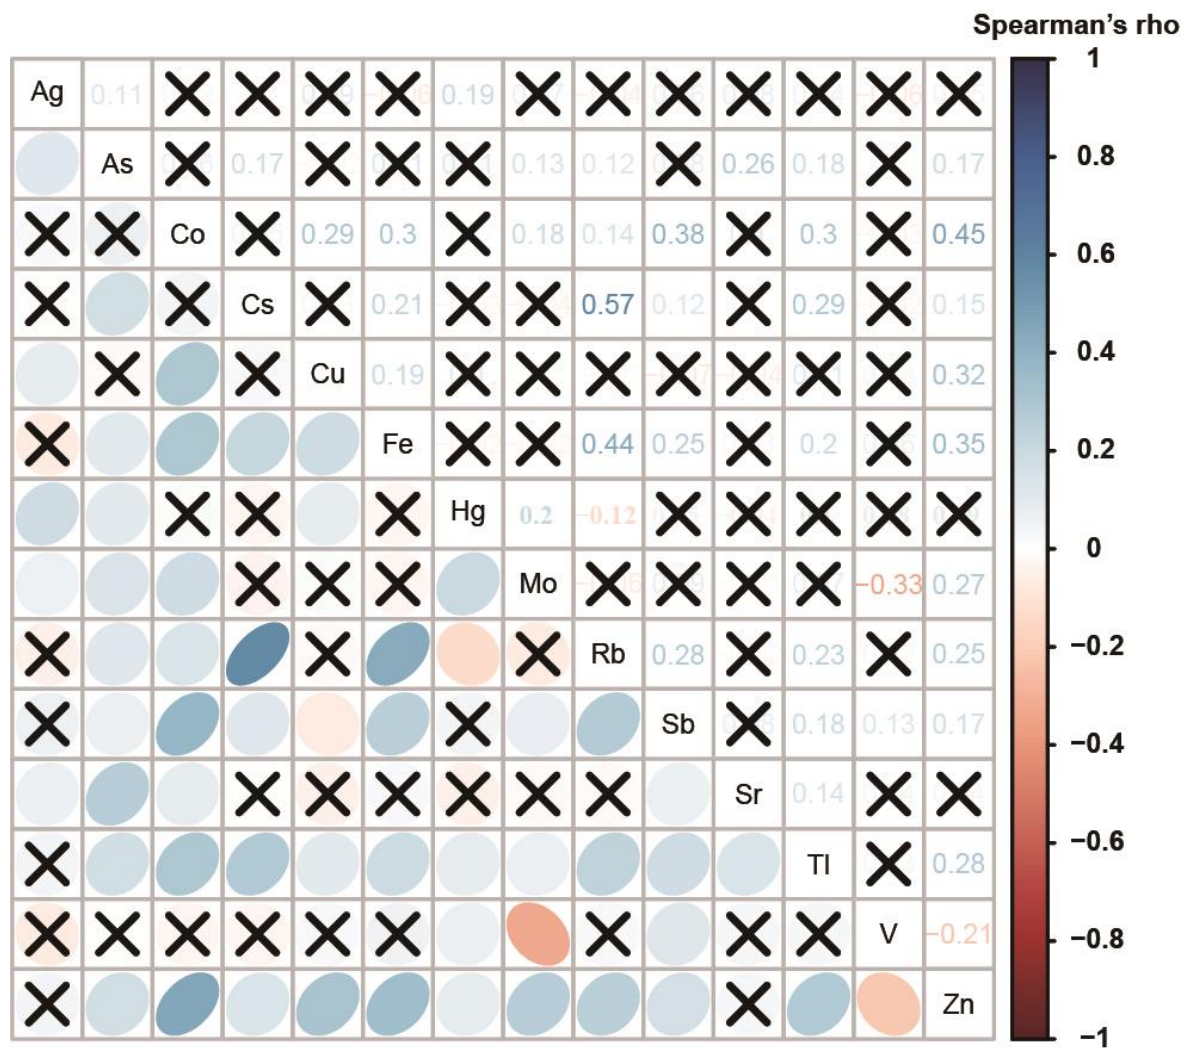

572  
573  
574  
575  
576

**Fig. S1 Pairwise Spearman correlations among trace elements.** Positive and negative correlations are indicated in blue and red, respectively (P value <0.05). Crosses indicate that the correlation was not statistically significant (P value ≥0.05).

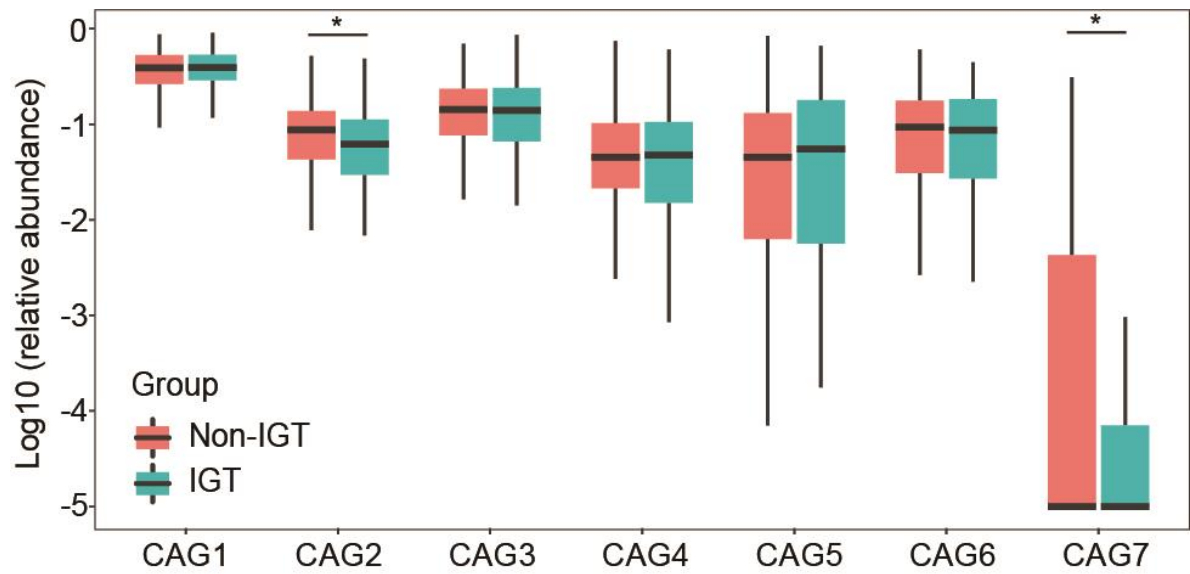

**Fig. S2 Gut microbiota structure was associated with IGT and blood glucose levels.**  
 CAGs abundance in Non-IGT and IGT groups. Significance between groups was tested using Mann-Whitney U test. \* indicates P-value < 0.05.

1  
2  
3  
4  
5  
6  
7  
8  
9  
10  
11  
12  
13  
14  
15  
16  
17  
18  
19  
20  
21  
22  
23  
24  
25  
26  
27  
28  
29  
30  
31  
32  
33  
34  
35  
36  
37  
38  
39  
40  
41  
42  
43  
44  
45  
46  
47  
48  
49  
50  
51  
52  
53  
54  
55  
56  
57  
58  
59  
60  
61  
62  
63  
64  
65
